# Supplementary material for: A comprehensive characterization of metabolic signatures—hypoxia, glycolysis, and lactylation—in non-healing diabetic foot ulcers
Source: Front Mol Biosci. 2025 Jul 9;12:1593390. doi: 10.3389/fmolb.2025.1593390 (PMC12284369; doi:10.3389/fmolb.2025.1593390)
Supplement: Supplementary file 6 [file Table9.xlsx]

## Sheet: Sheet1
Supplementary Table 9.Top 10 differentially expressed transcription factors between High-state and Other-state cells.
TFs	logFC	AveExpr	t	P.Value	adj.P.Val	B
MYC..26g.	0.115533	0.0636917	40.2088	1.783199e-316	5.527918e-315	714.355
KLF4..27g.	0.075394	0.060198	38.4317	7.3079e-292	1.13272e-290	657.726
MYC_extended..194g.	0.0820917	0.437452	34.2562	6.60254e-237	5.11697e-236	531.296
ATF3_extended..247g.	0.0674996	0.467186	33.4682	5.07935e-227	2.62433e-226	508.554
MAF..12g.	0.0917958	0.0558525	33.3969	3.91202e-226	1.73246e-225	506.515
FOS_extended..91g.	0.0418097	0.192327	28.8448	1.92732e-172	7.46838e-172	383.024
HMGB2..126g.	0.0327869	0.22784	24.7879	8.69166e-130	2.44947e-129	284.954
CEBPB..177g.	0.0249079	0.165341	22.4087	2.92627e-107	7.55952e-107	233.181
CEBPD_extended..181g.	0.0227124	0.145997	21.8707	1.95925e-102	4.67206e-102	222.093
EGR1_extended..22g.	0.0459693	0.142536	18.6252	1.66869e-75	3.69496e-75	160.239
