# Supplementary material for: A comprehensive characterization of metabolic signatures—hypoxia, glycolysis, and lactylation—in non-healing diabetic foot ulcers
Source: Front Mol Biosci. 2025 Jul 9;12:1593390. doi: 10.3389/fmolb.2025.1593390 (PMC12284369; doi:10.3389/fmolb.2025.1593390)
Supplement: Supplementary file 12 [file Table6.xlsx]

## Sheet: Supplementary Table 7
Supplementary Table 6. Gene Ontology (GO) Enrichment Analysis of Branch 1 in Pseudotime Trajectory
ID	Description	BgRatio	RichFactor	FoldEnrichment	zScore	pvalue	p.adjust	qvalue	geneID	Count	Category
GO:0030216	keratinocyte differentiation	178/18986	0.0393258426966292	31.1100187265918	14.3588139792766	1.71128380113602e-09	8.41951630158924e-07	5.89041897864715e-07	SFN/CSTA/DSP/AQP3/KRT6A/KRT5/KRT14	7	BP
GO:0009913	epidermal cell differentiation	251/18986	0.0278884462151394	22.0620849933599	11.9503389508016	1.85473862686891e-08	4.56265702209752e-06	3.19210279466386e-06	SFN/CSTA/DSP/AQP3/KRT6A/KRT5/KRT14	7	BP
GO:0043588	skin development	324/18986	0.0216049382716049	17.0913065843621	10.3933026133766	1.06561275394346e-07	1.74760491646728e-05	1.22265042294566e-05	SFN/CSTA/DSP/AQP3/KRT6A/KRT5/KRT14	7	BP
GO:0008544	epidermis development	393/18986	0.0178117048346056	14.0905428329092	9.32927826656114	3.94236586160314e-07	4.84911000977186e-05	3.39250957037955e-05	SFN/CSTA/DSP/AQP3/KRT6A/KRT5/KRT14	7	BP
GO:0045109	intermediate filament organization	73/18986	0.0547945205479452	43.3470319634703	12.8965351444034	2.01608210326737e-06	0.000198382478961509	0.000138791336372301	DSP/KRT6A/KRT5/KRT14	4	BP
GO:0045104	intermediate filament cytoskeleton organization	94/18986	0.0425531914893617	33.6631205673759	11.2940962048978	5.54933248185131e-06	0.000406839887701906	0.00028463124364254	DSP/KRT6A/KRT5/KRT14	4	BP
GO:0045103	intermediate filament-based process	95/18986	0.0421052631578947	33.3087719298246	11.2311345385495	5.78837238600273e-06	0.000406839887701906	0.00028463124364254	DSP/KRT6A/KRT5/KRT14	4	BP
GO:0071621	granulocyte chemotaxis	129/18986	0.0310077519379845	24.5297157622739	9.53990579287067	1.94511661343679e-05	0.00119624671726363	0.000836912016570831	S100A8/S100A14/PERP/CXADR	4	BP
GO:0097530	granulocyte migration	156/18986	0.0256410256410256	20.284188034188	8.60413760009786	4.09959713217304e-05	0.00224111309892126	0.00156791609616442	S100A8/S100A14/PERP/CXADR	4	BP
GO:0034113	heterotypic cell-cell adhesion	63/18986	0.0476190476190476	37.6706349206349	10.372001239059	6.70533827211974e-05	0.00329902642988291	0.00230804801577174	DSP/PERP/CXADR	3	BP
GO:0002934	desmosome organization	11/18986	0.181818181818182	143.833333333333	16.8579154881865	8.36445149646033e-05	0.00374119103296226	0.00261739295630864	DSP/PERP	2	BP
GO:0031424	keratinization	83/18986	0.036144578313253	28.5933734939759	8.96287477956074	0.000152592413832498	0.0061977475990726	0.0043360365102626	SFN/KRT6A/KRT5	3	BP
GO:0030593	neutrophil chemotaxis	85/18986	0.0352941176470588	27.9205882352941	8.84953533336789	0.000163761623552731	0.0061977475990726	0.0043360365102626	S100A8/PERP/CXADR	3	BP
GO:0030595	leukocyte chemotaxis	240/18986	0.0166666666666667	13.1847222222222	6.75827403983354	0.000216869548694532	0.0074591146009563	0.00521850764765236	S100A8/S100A14/PERP/CXADR	4	BP
GO:0097529	myeloid leukocyte migration	243/18986	0.0164609053497942	13.0219478737997	6.7100734680705	0.00022741203051696	0.0074591146009563	0.00521850764765236	S100A8/S100A14/PERP/CXADR	4	BP
GO:0001533	cornified envelope	60/19960	0.0833333333333333	69.3055555555556	18.3848932449943	8.42109278209005e-09	3.20001525719422e-07	2.21607704791843e-07	CSTA/DSP/KRT14/DSC3/SERPINB5	5	CC
GO:0045178	basal part of cell	317/19960	0.0189274447949527	15.7413249211356	9.17948336273959	1.61868169742066e-06	3.07549522509925e-05	2.12984433871139e-05	TACSTD2/CLCA2/DSP/AQP3/KRT14/CXADR	6	CC
GO:0030057	desmosome	30/19960	0.1	83.1666666666667	15.6263894681076	6.07037126251318e-06	7.6891369325167e-05	5.32488707237998e-05	DSP/PERP/DSC3	3	CC
GO:0045111	intermediate filament cytoskeleton	254/19960	0.0196850393700787	16.3713910761155	8.55434553068462	1.11883116194925e-05	0.000106288960385179	7.36073132861351e-05	S100A8/DSP/KRT6A/KRT5/KRT14	5	CC
GO:0009925	basal plasma membrane	298/19960	0.0167785234899329	13.9541387024609	7.81733685466485	2.41535779396028e-05	0.000183567192340981	0.000127124094418962	TACSTD2/CLCA2/DSP/AQP3/CXADR	5	CC
GO:0005882	intermediate filament	218/19960	0.018348623853211	15.2599388379205	7.34524579554906	0.000123897034893125	0.000784681220989791	0.000543408047776864	DSP/KRT6A/KRT5/KRT14	4	CC
GO:0045095	keratin filament	92/19960	0.0326086956521739	27.1195652173913	8.71241951078625	0.000178799870943326	0.000970627870835197	0.000672179965952352	KRT6A/KRT5/KRT14	3	CC
GO:0005912	adherens junction	189/19960	0.0158730158730159	13.2010582010582	5.84749797747247	0.0014606971335177	0.00693831138420908	0.00480492478130823	DSP/TRIM29/CXADR	3	CC
GO:0014704	intercalated disc	52/19960	0.0384615384615385	31.9871794871795	7.76293412716615	0.00177109238758755	0.00747794563648076	0.00517863271224429	DSP/CXADR	2	CC
GO:0044291	cell-cell contact zone	76/19960	0.0263157894736842	21.8859649122807	6.32944252282397	0.00374029697798973	0.0130232033742311	0.00901883890182207	DSP/CXADR	2	CC
GO:0016323	basolateral plasma membrane	264/19960	0.0113636363636364	9.45075757575758	4.7958389053887	0.00376987466096162	0.0130232033742311	0.00901883890182207	DSP/AQP3/CXADR	3	CC
GO:1904090	peptidase inhibitor complex	11/19960	0.0909090909090909	75.6060606060606	8.58748286657898	0.0131504960616207	0.0416432375284654	0.0288388071526769	CSTA	1	CC
GO:0016327	apicolateral plasma membrane	23/19960	0.0434782608695652	36.1594202898551	5.85371692359418	0.0273074430991752	0.0798217567514352	0.0552782248971158	CXADR	1	CC
GO:0043209	myelin sheath	48/19960	0.0208333333333333	17.3263888888889	3.92924682911767	0.0561785747406646	0.152484702867518	0.105598824700497	CALML3	1	CC
GO:0101003	ficolin-1-rich granule membrane	61/19960	0.0163934426229508	13.6338797814208	3.42879901521064	0.07086517533172	0.179525110840357	0.124324869003018	DSP	1	CC
GO:0048306	calcium-dependent protein binding	79/18737	0.0506329113924051	39.5295358649789	12.2898654897083	2.91671408020678e-06	0.000245003982737369	0.000153511267379304	S100A8/S100A2/S100A16/S100A14	4	MF
GO:0005200	structural constituent of cytoskeleton	113/18737	0.0353982300884956	27.6356932153392	10.1704248544802	1.21409636418711e-05	0.000509920472958587	0.000319499043207135	DSP/KRT6A/KRT5/KRT14	4	MF
GO:0098632	cell-cell adhesion mediator activity	53/18737	0.0566037735849057	44.1910377358491	11.2763616324864	4.14736037459458e-05	0.00116126090488648	0.000727607083262206	DSP/TRIM29/CXADR	3	MF
GO:0098631	cell adhesion mediator activity	69/18737	0.0434782608695652	33.9438405797101	9.81798191649515	9.15198955480135e-05	0.00192191780650828	0.00120420915194755	DSP/TRIM29/CXADR	3	MF
GO:0086080	protein binding involved in heterotypic cell-cell adhesion	13/18737	0.153846153846154	120.108974358974	15.3847058044401	0.000121595222615758	0.00204279973994473	0.00127994971174482	DSP/CXADR	2	MF
GO:0030280	structural constituent of skin epidermis	37/18737	0.0540540540540541	42.2004504504505	8.98368206974942	0.00101892910563282	0.0142650074788595	0.0089379746108142	KRT6A/KRT5	2	MF
GO:0097110	scaffold protein binding	70/18737	0.0285714285714286	22.3059523809524	6.39565545081591	0.00360077957821268	0.0432093549385522	0.0270735306632532	DSP/KRT5	2	MF
GO:0005254	chloride channel activity	82/18737	0.024390243902439	19.0416666666667	5.86351857204347	0.00490551439184809	0.0515079011144049	0.0322731209990006	CLCA2/FXYD3	2	MF
GO:0005253	monoatomic anion channel activity	102/18737	0.0196078431372549	15.3080065359477	5.18903820339593	0.00749101965326905	0.0699161834305111	0.0438071324752576	CLCA2/FXYD3	2	MF
GO:0015108	chloride transmembrane transporter activity	120/18737	0.0166666666666667	13.0118055555556	4.72733541865074	0.0102391764669526	0.0724476965810736	0.0453932935971639	CLCA2/FXYD3	2	MF
GO:0050815	phosphoserine residue binding	10/18737	0.1	78.0708333333333	8.73028256875918	0.0127383441059866	0.0724476965810736	0.0453932935971639	SFN	1	MF
GO:0019215	intermediate filament binding	11/18737	0.0909090909090909	70.9734848484849	8.3134193379727	0.0140035910617966	0.0724476965810736	0.0453932935971639	KRT14	1	MF
GO:0050786	RAGE receptor binding	11/18737	0.0909090909090909	70.9734848484849	8.3134193379727	0.0140035910617966	0.0724476965810736	0.0453932935971639	S100A8	1	MF
GO:0004857	enzyme inhibitor activity	410/18737	0.00731707317073171	5.7125	3.45517423520121	0.0149680220651507	0.0724476965810736	0.0453932935971639	SFN/CSTA/SERPINB5	3	MF
GO:0008509	monoatomic anion transmembrane transporter activity	148/18737	0.0135135135135135	10.5501126126126	4.17718478657667	0.0152639733391425	0.0724476965810736	0.0453932935971639	CLCA2/FXYD3	2	MF
GO:0045295	gamma-catenin binding	12/18737	0.0833333333333333	65.0590277777778	7.94936436893689	0.015267283992188	0.0724476965810736	0.0453932935971639	DSC3	1	MF
GO:0015166	polyol transmembrane transporter activity	13/18737	0.0769230769230769	60.0544871794872	7.62777042265777	0.0165294247229861	0.0724476965810736	0.0453932935971639	AQP3	1	MF
GO:0035325	Toll-like receptor binding	13/18737	0.0769230769230769	60.0544871794872	7.62777042265777	0.0165294247229861	0.0724476965810736	0.0453932935971639	S100A8	1	MF
GO:0015103	inorganic anion transmembrane transporter activity	166/18737	0.0120481927710843	9.40612449799197	3.89587099676713	0.0189502728117059	0.0724476965810736	0.0453932935971639	CLCA2/FXYD3	2	MF
GO:0004866	endopeptidase inhibitor activity	168/18737	0.0119047619047619	9.29414682539682	3.86726963172653	0.0193809790826978	0.0724476965810736	0.0453932935971639	CSTA/SERPINB5	2	MF
GO:0015250	water channel activity	16/18737	0.0625	48.7942708333333	6.84926013218284	0.0203065519453541	0.0724476965810736	0.0453932935971639	AQP3	1	MF
GO:0030414	peptidase inhibitor activity	176/18737	0.0113636363636364	8.87168560606061	3.75747188395863	0.021144997477181	0.0724476965810736	0.0453932935971639	CSTA/SERPINB5	2	MF
GO:0036041	long-chain fatty acid binding	17/18737	0.0588235294117647	45.9240196078431	6.63624632032042	0.0215625020950952	0.0724476965810736	0.0453932935971639	S100A8	1	MF
GO:0098641	cadherin binding involved in cell-cell adhesion	18/18737	0.0555555555555556	43.3726851851852	6.44099953397253	0.0228169091436915	0.0724476965810736	0.0453932935971639	TRIM29	1	MF
GO:0005229	intracellularly calcium-gated chloride channel activity	19/18737	0.0526315789473684	41.0899122807018	6.26115616323331	0.024069774904713	0.0724476965810736	0.0453932935971639	CLCA2	1	MF
GO:0005372	water transmembrane transporter activity	19/18737	0.0526315789473684	41.0899122807018	6.26115616323331	0.024069774904713	0.0724476965810736	0.0453932935971639	AQP3	1	MF
GO:0141147	intracellularly calcium-gated channel activity	19/18737	0.0526315789473684	41.0899122807018	6.26115616323331	0.024069774904713	0.0724476965810736	0.0453932935971639	CLCA2	1	MF
GO:0061135	endopeptidase regulator activity	189/18737	0.0105820105820106	8.26146384479718	3.59317929705318	0.0241492321936912	0.0724476965810736	0.0453932935971639	CSTA/SERPINB5	2	MF
