# Supplementary material for: A comprehensive characterization of metabolic signatures—hypoxia, glycolysis, and lactylation—in non-healing diabetic foot ulcers
Source: Front Mol Biosci. 2025 Jul 9;12:1593390. doi: 10.3389/fmolb.2025.1593390 (PMC12284369; doi:10.3389/fmolb.2025.1593390)
Supplement: Supplementary file 13 [file Table11.xlsx]

## Sheet: RF
Supplementary Table 11. Random Forest feature importance scores
Genes	MeanDecreaseAccuracy
IL20RB	4.23146
GAMT	3.98765
DENND2C	3.98653
CSTA	3.86542
PKM	3.75235
EGFR	3.68875
SNAI2	3.60235
DDR1	3.55679
C19orf33	3.51099
TINCR	3.40128
KRT5	3.32046
ALDH3A2	3.27854
FBXW7	3.19877
PPP1R16A	3.13246
TRIM29	3.0433
ADRB2	2.90871
PERP	2.85679
TOB1	2.80456
TMSB10	2.76823
PKP1	2.70135
