# Supplementary material for: A comprehensive characterization of metabolic signatures—hypoxia, glycolysis, and lactylation—in non-healing diabetic foot ulcers
Source: Front Mol Biosci. 2025 Jul 9;12:1593390. doi: 10.3389/fmolb.2025.1593390 (PMC12284369; doi:10.3389/fmolb.2025.1593390)
Supplement: Supplementary file 15 [file Table10.xlsx]

## Sheet: Sheet1
Supplementary Table 10. LASSO model coefficients
Genes	Coefficient
TRIM29	-0.0602653
CSTA	-0.119175
TUBA1C	0.547815
PKM	2.45504
GAMT	0.504715
MIB2	-1.5166
EGFR	-1.13546
S100A2	-0.743291
