# Supplementary material for: A comprehensive characterization of metabolic signatures—hypoxia, glycolysis, and lactylation—in non-healing diabetic foot ulcers
Source: Front Mol Biosci. 2025 Jul 9;12:1593390. doi: 10.3389/fmolb.2025.1593390 (PMC12284369; doi:10.3389/fmolb.2025.1593390)
Supplement: Supplementary file 17 [file Table12.xlsx]

## Sheet: Sheet1
Supplementary Table 12. SVM model weights
Genes	Weight
CA12	0.033806
PKM	0.0331045
MPZL2	0.0318231
TUBA1C	0.0316488
GAMT	0.0312399
SNAI2	0.0291509
C19orf48	0.0291374
IL1RN	0.027773
AVPI1	-0.0272535
CA2	0.0262485
MALAT1	-0.0259595
ALDH2	-0.0259046
TUBB4B	0.0258801
PACSIN3	0.0258537
PHLDA2	0.0252187
ATP1B3	0.0248642
EGFR	-0.0241578
IRX2	-0.023592
MIB2	-0.0235257
RAB4A	-0.023297
