# Supplementary material for: A comprehensive characterization of metabolic signatures—hypoxia, glycolysis, and lactylation—in non-healing diabetic foot ulcers
Source: Front Mol Biosci. 2025 Jul 9;12:1593390. doi: 10.3389/fmolb.2025.1593390 (PMC12284369; doi:10.3389/fmolb.2025.1593390)
Supplement: Supplementary file 18 [file Table5.xlsx]

## Sheet: Supp Table 5
Var1	Var2	Freq	p_value
Hypoxia	BIOCARTA_IL10_PATHWAY	0.0551837	7.10669e-06
Glycosis	BIOCARTA_IL10_PATHWAY	-0.0972962	2.19003e-15
Lactylation	BIOCARTA_IL10_PATHWAY	0.0368443	0.00272767
Hypoxia	BIOCARTA_IL6_PATHWAY	0.440705	0
Glycosis	BIOCARTA_IL6_PATHWAY	0.0661447	7.27695e-08
Lactylation	BIOCARTA_IL6_PATHWAY	0.135476	1.81816e-28
Hypoxia	GOBP_ANGIOGENESIS_INVOLVED_IN_WOUND_HEALING	0.0332178	0.00689821
Glycosis	GOBP_ANGIOGENESIS_INVOLVED_IN_WOUND_HEALING	-0.219355	7.02886e-73
Lactylation	GOBP_ANGIOGENESIS_INVOLVED_IN_WOUND_HEALING	-0.0959207	5.39047e-15
Hypoxia	GOBP_IMMUNE_RESPONSE	0.0787974	1.3891e-10
Glycosis	GOBP_IMMUNE_RESPONSE	-0.191154	1.83343e-55
Lactylation	GOBP_IMMUNE_RESPONSE	-0.032207	0.00880683
Hypoxia	GOBP_INFLAMMATORY_RESPONSE	0.514304	0
Glycosis	GOBP_INFLAMMATORY_RESPONSE	0.127042	3.32667e-25
Lactylation	GOBP_INFLAMMATORY_RESPONSE	0.204776	1.49113e-63
Hypoxia	GOBP_INFLAMMATORY_RESPONSE_TO_WOUNDING	0.185148	4.37628e-52
Glycosis	GOBP_INFLAMMATORY_RESPONSE_TO_WOUNDING	0.0220122	0.0734457
Lactylation	GOBP_INFLAMMATORY_RESPONSE_TO_WOUNDING	0.00861599	0.48356
Hypoxia	GOBP_TOLL_LIKE_RECEPTOR_SIGNALING_PATHWAY	0.226345	1.33963e-77
Glycosis	GOBP_TOLL_LIKE_RECEPTOR_SIGNALING_PATHWAY	0.0632863	2.59039e-07
Lactylation	GOBP_TOLL_LIKE_RECEPTOR_SIGNALING_PATHWAY	0.1813	5.55991e-50
Hypoxia	GOBP_T_CELL_RECEPTOR_SIGNALING_PATHWAY	0.0316192	0.010122
Glycosis	GOBP_T_CELL_RECEPTOR_SIGNALING_PATHWAY	-0.218381	3.10391e-72
Lactylation	GOBP_T_CELL_RECEPTOR_SIGNALING_PATHWAY	0.0681141	2.94161e-08
Hypoxia	GO_EXTRACELLULAR_MATRIX	0.116012	2.93551e-21
Glycosis	GO_EXTRACELLULAR_MATRIX	0.130158	2.19507e-26
Lactylation	GO_EXTRACELLULAR_MATRIX	-0.102492	6.50066e-17
Hypoxia	HALLMARK_REACTIVE_OXYGEN_SPECIES_PATHWAY	0.30277	2.91075e-140
Glycosis	HALLMARK_REACTIVE_OXYGEN_SPECIES_PATHWAY	0.418213	2.17268e-278
Lactylation	HALLMARK_REACTIVE_OXYGEN_SPECIES_PATHWAY	0.304438	7.23358e-142
Hypoxia	HALLMARK_TNFA_SIGNALING_VIA_NFKB	0.670332	0
Glycosis	HALLMARK_TNFA_SIGNALING_VIA_NFKB	0.128255	1.16355e-25
Lactylation	HALLMARK_TNFA_SIGNALING_VIA_NFKB	0.297987	1.01375e-135
Hypoxia	HP_INSULIN_RESISTANT_DIABETES_MELLITUS	0.1036	3.00073e-17
Glycosis	HP_INSULIN_RESISTANT_DIABETES_MELLITUS	-0.0036059	0.769369
Lactylation	HP_INSULIN_RESISTANT_DIABETES_MELLITUS	0.0767532	4.10163e-10
Hypoxia	KEGG_FOCAL_ADHESION	0.0722435	4.05618e-09
Glycosis	KEGG_FOCAL_ADHESION	-0.011125	0.36567
Lactylation	KEGG_FOCAL_ADHESION	-0.0401722	0.00108401
Hypoxia	KEGG_INSULIN_SIGNALING_PATHWAY	0.136595	6.46732e-29
Glycosis	KEGG_INSULIN_SIGNALING_PATHWAY	0.00475871	0.698802
Lactylation	KEGG_INSULIN_SIGNALING_PATHWAY	0.200547	5.60704e-61
Hypoxia	KEGG_MTOR_SIGNALING_PATHWAY	0.0523561	2.04376e-05
Glycosis	KEGG_MTOR_SIGNALING_PATHWAY	0.00420181	0.73261
Lactylation	KEGG_MTOR_SIGNALING_PATHWAY	0.0702198	1.08605e-08
Hypoxia	KEGG_NATURAL_KILLER_CELL_MEDIATED_CYTOTOXICITY	0.0363255	0.00313031
Glycosis	KEGG_NATURAL_KILLER_CELL_MEDIATED_CYTOTOXICITY	-0.264127	5.48664e-106
Lactylation	KEGG_NATURAL_KILLER_CELL_MEDIATED_CYTOTOXICITY	0.122453	1.61285e-23
Hypoxia	KEGG_TYPE_II_DIABETES_MELLITUS	0.262327	1.59962e-104
Glycosis	KEGG_TYPE_II_DIABETES_MELLITUS	0.0443618	0.000307514
Lactylation	KEGG_TYPE_II_DIABETES_MELLITUS	0.178615	1.53268e-48
Hypoxia	KEGG_TYPE_I_DIABETES_MELLITUS	-0.0376802	0.00217735
Glycosis	KEGG_TYPE_I_DIABETES_MELLITUS	-0.335415	1.27371e-173
Lactylation	KEGG_TYPE_I_DIABETES_MELLITUS	0.0489081	6.9161e-05
Hypoxia	KEGG_VASCULAR_SMOOTH_MUSCLE_CONTRACTION	0.0592709	1.4097e-06
Glycosis	KEGG_VASCULAR_SMOOTH_MUSCLE_CONTRACTION	-0.0485733	7.75389e-05
Lactylation	KEGG_VASCULAR_SMOOTH_MUSCLE_CONTRACTION	0.162337	2.71653e-40
Hypoxia	WP_OXIDATIVE_STRESS_RESPONSE	0.568184	0
Glycosis	WP_OXIDATIVE_STRESS_RESPONSE	0.327734	2.14694e-165
Lactylation	WP_OXIDATIVE_STRESS_RESPONSE	0.260453	5.21297e-103
