# Supplementary material for: A comprehensive characterization of metabolic signatures—hypoxia, glycolysis, and lactylation—in non-healing diabetic foot ulcers
Source: Front Mol Biosci. 2025 Jul 9;12:1593390. doi: 10.3389/fmolb.2025.1593390 (PMC12284369; doi:10.3389/fmolb.2025.1593390)
Supplement: Supplementary file 19 [file Table7.xlsx]

## Sheet: Supplementary Table 8
Supplementary Table 7. Gene Ontology (GO) Enrichment Analysis of Branch 2 in Pseudotime Trajectory
ID	Description	BgRatio	RichFactor	FoldEnrichment	zScore	pvalue	p.adjust	qvalue	geneID	Count	Category
GO:0001101	response to acid chemical	144/18986	0.0416666666666667	31.6433333333333	13.402889518787	2.69627181447501e-08	1.32172740105991e-05	9.38897698817431e-06	COL3A1/COL1A2/COL4A1/COL1A1/COL18A1/COL6A1	6	BP
GO:0030199	collagen fibril organization	72/18986	0.0694444444444444	52.7388888888889	15.9712	3.41090942209009e-08	1.32172740105991e-05	9.38897698817431e-06	COL3A1/COL1A2/COL1A1/COL18A1/COL6A1	5	BP
GO:0071230	cellular response to amino acid stimulus	91/18986	0.0549450549450549	41.7274725274725	14.1409762672362	1.11490932002087e-07	2.28448913614811e-05	1.62280179043187e-05	COL3A1/COL1A2/COL4A1/COL1A1/COL6A1	5	BP
GO:0071229	cellular response to acid chemical	100/18986	0.05	37.972	13.4600798923153	1.79072237625249e-07	2.28448913614811e-05	1.62280179043187e-05	COL3A1/COL1A2/COL4A1/COL1A1/COL6A1	5	BP
GO:0030198	extracellular matrix organization	339/18986	0.0206489675516224	15.6816519174041	9.90409900261135	1.98276837752604e-07	2.28448913614811e-05	1.62280179043187e-05	COL3A1/COL1A2/COL4A1/COL4A2/COL1A1/COL18A1/COL6A1	7	BP
GO:0043062	extracellular structure organization	340/18986	0.0205882352941176	15.6355294117647	9.88780154747212	2.02274949275819e-07	2.28448913614811e-05	1.62280179043187e-05	COL3A1/COL1A2/COL4A1/COL4A2/COL1A1/COL18A1/COL6A1	7	BP
GO:0045229	external encapsulating structure organization	341/18986	0.0205278592375367	15.5896774193548	9.87157322296189	2.06340954232733e-07	2.28448913614811e-05	1.62280179043187e-05	COL3A1/COL1A2/COL4A1/COL4A2/COL1A1/COL18A1/COL6A1	7	BP
GO:0038063	collagen-activated tyrosine kinase receptor signaling pathway	11/18986	0.272727272727273	207.12	24.8296312637595	3.30453363472561e-07	3.20126695864044e-05	2.27404090915986e-05	COL4A1/COL4A2/COL1A1	3	BP
GO:0043200	response to amino acid	129/18986	0.0387596899224806	29.4356589147287	11.7670212246371	6.38146595353085e-07	5.49515123776268e-05	3.90351660081478e-05	COL3A1/COL1A2/COL4A1/COL1A1/COL6A1	5	BP
GO:0038065	collagen-activated signaling pathway	15/18986	0.2	151.888	21.2275516143526	9.08086561145569e-07	7.03767084887816e-05	4.99925548925403e-05	COL4A1/COL4A2/COL1A1	3	BP
GO:0061448	connective tissue development	290/18986	0.0206896551724138	15.7125517241379	9.16763550496697	1.67281168753859e-06	0.000117857187076582	8.37206232136538e-05	COL3A1/TIMP1/MGP/COL1A1/SELENOM/COL6A1	6	BP
GO:0051216	cartilage development	209/18986	0.0239234449760766	18.1684210526316	9.06223002558178	6.84257266096994e-06	0.000441916151020975	0.000313918026463797	COL3A1/TIMP1/MGP/COL1A1/COL6A1	5	BP
GO:0007229	integrin-mediated signaling pathway	111/18986	0.036036036036036	27.3672072072072	10.1164194366748	1.27320820805037e-05	0.000704811686599309	0.000500667588579204	COL3A1/TIMP1/THY1/CD63	4	BP
GO:0032963	collagen metabolic process	111/18986	0.036036036036036	27.3672072072072	10.1164194366748	1.27320820805037e-05	0.000704811686599309	0.000500667588579204	COL1A2/VIM/COL1A1/COL6A1	4	BP
GO:0071711	basement membrane organization	38/18986	0.0789473684210526	59.9557894736842	13.2093441611749	1.65032559906297e-05	0.000852668226182533	0.000605698447936794	COL3A1/COL4A1/COL6A1	3	BP
GO:0005788	endoplasmic reticulum lumen	314/19960	0.0445859872611465	35.5974522292994	21.8828128411255	1.62402186040398e-19	1.41289901855146e-17	8.71843314532664e-18	COL3A1/IGFBP7/COL1A2/TIMP1/SERPING1/COL4A1/COL4A2/IGFBP4/COL1A1/SELENOM/LGALS1/COL18A1/COL6A1/COL6A2	14	CC
GO:0062023	collagen-containing extracellular matrix	430/19960	0.0325581395348837	25.9944186046512	18.5548487542879	1.35081760555495e-17	5.87605658416402e-16	3.62587883596328e-16	COL3A1/IGFBP7/SPARC/COL1A2/TIMP1/SERPING1/MGP/COL4A1/COL4A2/COL1A1/LGALS1/COL18A1/COL6A1/COL6A2	14	CC
GO:0005581	collagen trimer	86/19960	0.0930232558139535	74.2697674418605	24.1136342523683	8.66904789507987e-14	2.51402388957316e-12	1.55130330754061e-12	COL3A1/COL1A2/COL4A1/COL4A2/COL1A1/COL18A1/COL6A1/COL6A2	8	CC
GO:0098644	complex of collagen trimers	21/19960	0.238095238095238	190.095238095238	30.7022233285864	4.04270584157562e-11	8.79288520542696e-10	5.4257367873778e-10	COL3A1/COL1A2/COL4A1/COL4A2/COL1A1	5	CC
GO:0005604	basement membrane	92/19960	0.0652173913043478	52.0695652173913	17.3864242173976	1.34126667465894e-09	2.33380401390656e-08	1.44009685068644e-08	SPARC/TIMP1/COL4A1/COL4A2/COL18A1/COL6A1	6	CC
GO:0005583	fibrillar collagen trimer	12/19960	0.25	199.6	24.3697717093996	3.79011780047311e-07	4.71057498058801e-06	2.90670688457336e-06	COL3A1/COL1A2/COL1A1	3	CC
GO:0098643	banded collagen fibril	12/19960	0.25	199.6	24.3697717093996	3.79011780047311e-07	4.71057498058801e-06	2.90670688457336e-06	COL3A1/COL1A2/COL1A1	3	CC
GO:0031093	platelet alpha granule lumen	67/19960	0.0447761194029851	35.7492537313433	10.0893692278892	7.88615184841276e-05	0.000857619013514888	0.000529202295090856	SPARC/TIMP1/SERPING1	3	CC
GO:0031091	platelet alpha granule	91/19960	0.032967032967033	26.3208791208791	8.57319584216631	0.000196063201502904	0.00189527761452808	0.00116949979843838	SPARC/TIMP1/SERPING1	3	CC
GO:0030016	myofibril	243/19960	0.0123456790123457	9.85679012345679	4.91915316839178	0.0033628639955704	0.0292569167614625	0.0180532698709569	CALD1/MYL9/COL6A1	3	CC
GO:0043292	contractile muscle fiber	253/19960	0.0118577075098814	9.46719367588933	4.79977378614988	0.00376607081430356	0.0297861964404009	0.0183798671320078	CALD1/MYL9/COL6A1	3	CC
GO:0001725	stress fiber	85/19960	0.0235294117647059	18.7858823529412	5.81919060975329	0.00504525546944075	0.0337644019877958	0.0208346582138849	CALD1/MYL9	2	CC
GO:0097517	contractile actin filament bundle	85/19960	0.0235294117647059	18.7858823529412	5.81919060975329	0.00504525546944075	0.0337644019877958	0.0208346582138849	CALD1/MYL9	2	CC
GO:0042641	actomyosin	91/19960	0.021978021978022	17.5472527472527	5.60260320247115	0.00576071464355785	0.0357987267135381	0.0220899584076278	CALD1/MYL9	2	CC
GO:0032432	actin filament bundle	95/19960	0.0210526315789474	16.8084210526316	5.46936977218013	0.00626204237635411	0.0363198457828539	0.0224115200837937	CALD1/MYL9	2	CC
GO:0005201	extracellular matrix structural constituent	166/18737	0.0662650602409639	49.6643373493976	23.0194822795765	7.55981951258134e-17	3.32632058553579e-15	1.51196390251627e-15	COL3A1/IGFBP7/SPARC/COL1A2/MGP/COL4A1/COL4A2/COL1A1/COL18A1/COL6A1/COL6A2	11	MF
GO:0030020	extracellular matrix structural constituent conferring tensile strength	45/18737	0.177777777777778	133.240888888889	32.4632853579617	6.01452447028936e-16	1.32319538346366e-14	6.01452447028936e-15	COL3A1/COL1A2/COL4A1/COL4A2/COL1A1/COL18A1/COL6A1/COL6A2	8	MF
GO:0048407	platelet-derived growth factor binding	11/18737	0.454545454545455	340.672727272727	41.1891519322897	1.26933116699134e-12	1.8616857115873e-11	8.46220777994226e-12	COL3A1/COL1A2/COL4A1/COL1A1/COL6A1	5	MF
GO:0019838	growth factor binding	132/18737	0.053030303030303	39.7451515151515	16.3281819340784	3.1729099770553e-10	3.49020097476083e-09	1.58645498852765e-09	COL3A1/IGFBP7/COL1A2/COL4A1/IGFBP4/COL1A1/COL6A1	7	MF
GO:0005518	collagen binding	69/18737	0.0434782608695652	32.5860869565217	9.60770842717538	0.000103725868074083	0.00091278763905193	0.000414903472296332	SPARC/COL6A1/COL6A2	3	MF
GO:0005520	insulin-like growth factor binding	19/18737	0.105263157894737	78.8926315789474	12.4162884792288	0.000288222901108275	0.00211363460812735	0.000960743003694249	IGFBP7/IGFBP4	2	MF
GO:0002020	protease binding	136/18737	0.0220588235294118	16.5326470588235	6.64500207191293	0.000765307646710423	0.00481050520789409	0.00218659327631549	COL3A1/COL1A2/COL1A1	3	MF
GO:0050840	extracellular matrix binding	65/18737	0.0307692307692308	23.0609230769231	6.51228319400528	0.00337659921086129	0.0185712956597371	0.00844149802715322	SPARC/LGALS1	2	MF
GO:0017022	myosin binding	75/18737	0.0266666666666667	19.9861333333333	6.0219397272232	0.00446826112450767	0.0217572663426955	0.00988966651940707	CALD1/MYL9	2	MF
GO:0046332	SMAD binding	79/18737	0.0253164556962025	18.9741772151899	5.85165023204435	0.00494483325970353	0.0217572663426955	0.00988966651940707	COL3A1/COL1A2	2	MF
GO:0019215	intermediate filament binding	11/18737	0.0909090909090909	68.1345454545455	8.14082135717731	0.0145831860224296	0.0529012829223228	0.0240460376919649	VIM	1	MF
GO:0031994	insulin-like growth factor I binding	13/18737	0.0769230769230769	57.6523076923077	7.4685845855793	0.0172126458782583	0.0529012829223228	0.0240460376919649	IGFBP4	1	MF
GO:0032036	myosin heavy chain binding	13/18737	0.0769230769230769	57.6523076923077	7.4685845855793	0.0172126458782583	0.0529012829223228	0.0240460376919649	MYL9	1	MF
GO:0008191	metalloendopeptidase inhibitor activity	14/18737	0.0714285714285714	53.5342857142857	7.18732808262141	0.0185248486048682	0.0529012829223228	0.0240460376919649	TIMP1	1	MF
GO:0005178	integrin binding	161/18737	0.0124223602484472	9.31031055900621	3.87081512560713	0.01933919516474	0.0529012829223228	0.0240460376919649	COL3A1/THY1	2	MF
GO:0005523	tropomyosin binding	15/18737	0.0666666666666667	49.9653333333333	6.93436285376296	0.0198353692898479	0.0529012829223228	0.0240460376919649	CALD1	1	MF
GO:0004866	endopeptidase inhibitor activity	168/18737	0.0119047619047619	8.92238095238095	3.77020047172643	0.0209437971423976	0.0529012829223228	0.0240460376919649	TIMP1/SERPING1	2	MF
GO:0070492	oligosaccharide binding	17/18737	0.0588235294117647	44.0870588235294	6.49630978916573	0.0224513727980504	0.0529012829223228	0.0240460376919649	LGALS1	1	MF
GO:0030414	peptidase inhibitor activity	176/18737	0.0113636363636364	8.51681818181818	3.66216605602637	0.0228437358073667	0.0529012829223228	0.0240460376919649	TIMP1/SERPING1	2	MF
