# Supplementary material for: A comprehensive characterization of metabolic signatures—hypoxia, glycolysis, and lactylation—in non-healing diabetic foot ulcers
Source: Front Mol Biosci. 2025 Jul 9;12:1593390. doi: 10.3389/fmolb.2025.1593390 (PMC12284369; doi:10.3389/fmolb.2025.1593390)
Supplement: Supplementary file 20 [file Table8.xlsx]

## Sheet: Supplementary Table 9
Supplementary Table 8.Gene Ontology (GO) Enrichment Analysis of Branch 3 in Pseudotime Trajectory
ID	Description	GeneRatio	BgRatio	RichFactor	FoldEnrichment	zScore	pvalue	p.adjust	qvalue	geneID	Count	Category
GO:0050863	regulation of T cell activation	45862	393/18986	0.0178117048346056	14.0905428329092	9.32927826656114	3.94236586160314e-07	0.000364967307759539	0.000205957916399261	LAPTM5/PTPRC/HLA-A/ACTB/CD69/CORO1A/RAC2	7	BP
GO:0007159	leukocyte cell-cell adhesion	45862	430/18986	0.0162790697674419	12.8781007751938	8.86355414241788	7.21992695864568e-07	0.000364967307759539	0.000205957916399261	LAPTM5/PTPRC/HLA-A/ACTB/CD69/CORO1A/RAC2	7	BP
GO:0070665	positive regulation of leukocyte proliferation	45801	166/18986	0.0301204819277108	23.8278112449799	10.5093863448321	1.78723264812316e-06	0.000602297402417505	0.00033988775273079	PTPRC/HLA-A/GPR183/CORO1A/RAC2	5	BP
GO:1903037	regulation of leukocyte cell-cell adhesion	45832	392/18986	0.0153061224489796	12.1084183673469	7.90638026895348	7.32338646526387e-06	0.00150989934986459	0.000852064602661888	LAPTM5/PTPRC/HLA-A/ACTB/CD69/CORO1A	6	BP
GO:0050900	leukocyte migration	45832	404/18986	0.0148514851485149	11.7487623762376	7.76911888474046	8.6995408073178e-06	0.00150989934986459	0.000852064602661888	CXCR4/GPSM3/CD69/GPR183/CORO1A/RAC2	6	BP
GO:0030595	leukocyte chemotaxis	45801	240/18986	0.0208333333333333	16.4809027777778	8.5865054162196	1.08133354185592e-05	0.00150989934986459	0.000852064602661888	CXCR4/GPSM3/GPR183/CORO1A/RAC2	5	BP
GO:0050670	regulation of lymphocyte proliferation	45801	240/18986	0.0208333333333333	16.4809027777778	8.5865054162196	1.08133354185592e-05	0.00150989934986459	0.000852064602661888	PTPRC/HLA-A/GPR183/CORO1A/RAC2	5	BP
GO:0032944	regulation of mononuclear cell proliferation	45801	245/18986	0.0204081632653061	16.1445578231293	8.48813171333232	1.19477693362184e-05	0.00150989934986459	0.000852064602661888	PTPRC/HLA-A/GPR183/CORO1A/RAC2	5	BP
GO:0045730	respiratory burst	45740	40/18986	0.075	59.3312	13.1383662067373	1.70040508799093e-05	0.00191012171550981	0.0010779176113346	CD52/CYBA/RAC2	3	BP
GO:0070663	regulation of leukocyte proliferation	45801	270/18986	0.0185185185185185	14.6496913580247	8.0365017880303	1.90909845562567e-05	0.00193009853863755	0.00108919090836749	PTPRC/HLA-A/GPR183/CORO1A/RAC2	5	BP
GO:0046651	lymphocyte proliferation	45801	297/18986	0.0168350168350168	13.3179012345679	7.61185945147735	3.01597983894465e-05	0.00243266388037616	0.00137279798340765	PTPRC/HLA-A/GPR183/CORO1A/RAC2	5	BP
GO:0050671	positive regulation of lymphocyte proliferation	45771	145/18986	0.0275862068965517	21.8229885057471	8.95455351352413	3.07936206022854e-05	0.00243266388037616	0.00137279798340765	PTPRC/HLA-A/GPR183/CORO1A	4	BP
GO:0032946	positive regulation of mononuclear cell proliferation	45771	148/18986	0.027027027027027	21.3806306306306	8.85523171750838	3.33661324481735e-05	0.00243266388037616	0.00137279798340765	PTPRC/HLA-A/GPR183/CORO1A	4	BP
GO:0032943	mononuclear cell proliferation	45801	305/18986	0.0163934426229508	12.9685792349727	7.49654770827983	3.4246474166157e-05	0.00243266388037616	0.00137279798340765	PTPRC/HLA-A/GPR183/CORO1A/RAC2	5	BP
GO:0001909	leukocyte mediated cytotoxicity	45771	151/18986	0.0264900662251656	20.9558498896247	8.75880263422791	3.60929359106255e-05	0.00243266388037616	0.00137279798340765	PTPRC/HLA-A/CORO1A/HCST	4	BP
GO:0045335	phagocytic vesicle	45802	145/19960	0.0344827586206897	27.5310344827586	11.354615184476	8.92193662899633e-07	0.000117769563502752	7.41929467042853e-05	HLA-A/VIM/CORO1A/CYBA/RAC2	5	CC
GO:0030670	phagocytic vesicle membrane	45772	82/19960	0.0487804878048781	38.9463414634146	12.1933142553331	3.13370526340722e-06	0.000180574483694428	0.000113759044751673	HLA-A/CORO1A/CYBA/RAC2	4	CC
GO:0030139	endocytic vesicle	45833	356/19960	0.0168539325842697	13.4561797752809	8.39786314843433	4.10396553850972e-06	0.000180574483694428	0.000113759044751673	HLA-A/VIM/HSP90AA1/CORO1A/CYBA/RAC2	6	CC
GO:0005884	actin filament	45772	123/19960	0.032520325203252	25.9642276422764	9.83476453880429	1.57133341997543e-05	0.000518540028591892	0.000326671947836998	ACTB/CORO1A/COTL1/RAC2	4	CC
GO:0030666	endocytic vesicle membrane	45772	207/19960	0.0193236714975845	15.4280193236715	7.38935666936728	0.000119813435041637	0.00316307468509921	0.00199268660385038	HLA-A/CORO1A/CYBA/RAC2	4	CC
GO:0031252	cell leading edge	45802	433/19960	0.0115473441108545	9.21939953810624	6.12346937425393	0.00017426585802359	0.00383384887651898	0.00241526364629186	CXCR4/ACTB/VIM/CORO1A/RAC2	5	CC
GO:0043020	NADPH oxidase complex	45713	18/19960	0.111111111111111	88.7111111111111	13.1837142888151	0.000227617216915563	0.00429221037612204	0.00270402408065105	CYBA/RAC2	2	CC
GO:0030863	cortical cytoskeleton	45741	109/19960	0.0275229357798165	21.9743119266055	7.77572781918258	0.000333810756259145	0.00550787747827589	0.00346987496637795	ACTB/CORO1A/COTL1	3	CC
GO:0009897	external side of plasma membrane	45772	407/19960	0.00982800982800983	7.84668304668305	4.94199158358353	0.00153453818047722	0.0205238719656086	0.0129297120038523	PTPRC/CXCR4/HLA-A/CD69	4	CC
GO:0001772	immunological synapse	45713	48/19960	0.0416666666666667	33.2666666666667	7.92589934842676	0.00163993700497249	0.0205238719656086	0.0129297120038523	CORO1A/CD37	2	CC
GO:0005925	focal adhesion	45772	424/19960	0.00943396226415094	7.53207547169811	4.81445988413494	0.00178275775259453	0.0205238719656086	0.0129297120038523	PTPRC/ACTB/VIM/RAC2	4	CC
GO:0030055	cell-substrate junction	45772	434/19960	0.00921658986175115	7.35852534562212	4.74270271127051	0.00194118001346553	0.0205238719656086	0.0129297120038523	PTPRC/ACTB/VIM/RAC2	4	CC
GO:0030027	lamellipodium	45741	203/19960	0.0147783251231527	11.7990147783251	5.47649793127296	0.00202129042085539	0.0205238719656086	0.0129297120038523	ACTB/CORO1A/RAC2	3	CC
GO:0097225	sperm midpiece	45713	58/19960	0.0344827586206897	27.5310344827586	7.1655757808138	0.0023848607898901	0.0224858303046781	0.0141657144662645	CD52/HSP90AA1	2	CC
GO:0030864	cortical actin cytoskeleton	45713	80/19960	0.025	19.96	6.01736575176344	0.0044829407134347	0.0394498782782253	0.0248527941306204	CORO1A/COTL1	2	CC
GO:0043548	phosphatidylinositol 3-kinase binding	45712	26/18737	0.0769230769230769	60.0544871794872	10.7910431223672	0.000501519802380556	0.0556686980642417	0.0369540907017252	CORO1A/HCST	2	MF
GO:0048156	tau protein binding	45712	43/18737	0.0465116279069767	36.312015503876	8.30190895052937	0.00137505872587997	0.0614295975723032	0.0407783009014815	ACTB/HSP90AA1	2	MF
GO:0140313	molecular sequestering activity	45712	54/18737	0.037037037037037	28.9151234567901	7.35674117282496	0.00216043846680702	0.0614295975723032	0.0407783009014815	LAPTM5/CD69	2	MF
GO:0003779	actin binding	45771	441/18737	0.0090702947845805	7.08125472411187	4.62814295269907	0.00221367919179471	0.0614295975723032	0.0407783009014815	CXCR4/CORO1A/COTL1/FXYD5	4	MF
GO:0097110	scaffold protein binding	45712	70/18737	0.0285714285714286	22.3059523809524	6.39565545081591	0.00360077957821268	0.0762466103796155	0.050614155775942	VIM/HSP90AA1	2	MF
GO:0017022	myosin binding	45712	75/18737	0.0266666666666667	20.8188888888889	6.15890057147149	0.00412143839889814	0.0762466103796155	0.050614155775942	CXCR4/CORO1A	2	MF
GO:0031625	ubiquitin protein ligase binding	45740	301/18737	0.00996677740863787	7.78114617940199	4.24742144498816	0.00647045478653358	0.102602925900747	0.068110050384564	LAPTM5/CXCR4/HSP90AA1	3	MF
GO:0044389	ubiquitin-like protein ligase binding	45740	321/18737	0.00934579439252336	7.29633956386293	4.07488498953672	0.00772241021603015	0.103626573857295	0.0687895701281237	LAPTM5/CXCR4/HSP90AA1	3	MF
GO:0005200	structural constituent of cytoskeleton	45712	113/18737	0.0176991150442478	13.8178466076696	4.89429521002604	0.00912426579629615	0.103626573857295	0.0687895701281237	ACTB/VIM	2	MF
GO:0016175	superoxide-generating NAD(P)H oxidase activity	45681	10/18737	0.1	78.0708333333333	8.73028256875918	0.0127383441059866	0.103626573857295	0.0687895701281237	CYBA	1	MF
GO:0030957	Tat protein binding	45681	10/18737	0.1	78.0708333333333	8.73028256875918	0.0127383441059866	0.103626573857295	0.0687895701281237	ACTB	1	MF
GO:0019215	intermediate filament binding	45681	11/18737	0.0909090909090909	70.9734848484849	8.3134193379727	0.0140035910617966	0.103626573857295	0.0687895701281237	VIM	1	MF
GO:0042608	T cell receptor binding	45681	11/18737	0.0909090909090909	70.9734848484849	8.3134193379727	0.0140035910617966	0.103626573857295	0.0687895701281237	HLA-A	1	MF
GO:0050998	nitric-oxide synthase binding	45681	11/18737	0.0909090909090909	70.9734848484849	8.3134193379727	0.0140035910617966	0.103626573857295	0.0687895701281237	ACTB	1	MF
GO:0098973	structural constituent of postsynaptic actin cytoskeleton	45681	11/18737	0.0909090909090909	70.9734848484849	8.3134193379727	0.0140035910617966	0.103626573857295	0.0687895701281237	ACTB	1	MF
