# Supplementary material for: A comprehensive characterization of metabolic signatures—hypoxia, glycolysis, and lactylation—in non-healing diabetic foot ulcers
Source: Frontiers journal article supplement (doi:10.3389/fmolb.2025.1593390), 2025-07-09
Supplement: Table_4.xls [file Table_4.xls]

Supplementary Table 4. Genes of Lactylation
ACAT2
ACIN1
ADAR
ADNP
AHNAK
ALB
ALDH1A1
ALDOA
ALDOB
ALYREF
ARGLU1
ARID1A
ARID3A
ARID3B
ARPP19
BCLAF1
BOLA2
BRD4
BTF3
BZW1
BZW2
C19orf53
CACYBP
CALD1
CALM1
CALML5
CALR
CBR1
CBX3
CBX5
CCNA2
CCT5
CD2BP2
CDC5L
CDV3
CDV3 
CDYL
CEBPZ
CFDP1
CHD4
CHERP
CNN2
CNN3
COPS4
CRABP2
CSRP1
CSRP2
CWC15
DDX17
DDX18
DDX21
DDX39A
DDX39B
DDX3X
DDX41
DDX42
DDX46
DDX5
DECR1
DFFA
DHRS7
DHX16
DHX9
EAF1
ECHDC1
EDF1
EEF1A1
EEF1G
EEF2
EHMT2
EIF3D
EIF3J
EIF4G1
EIF4G2
EIF4H
EMG1
ENO1
ENSA
FABP5
FAM50A
FKBP3
FLYWCH2
FUBP1
G6PD
GAPDH
GATAD2A
GATAD2B
GFAP
GIGYF2
GTF2F1
GTF2I
H1-2
H1-3
H1-5
H2AFV
H2AFZ
H2AJ
H2AX
H2AZ1
H2AZ2
H2BC13
H2BC14
H2BC18
H2BC5
H2BU1
H3-3A
H3C1
H3C15
H4C1
HCFC1
HDAC1
HDAC2
HDGF
HDGFL2
HEXIM1
HIST1H1C
HIST1H2BB
HIST1H2BD
HIST1H2BH
HIST1H2BK
HIST1H2BL
HIST1H2BN
HIST1H2BO
HIST1H3A
HIST1H4A
HIST2H2BE
HIST2H2BF
HISTIH2BH
HLTF
HMGA1
HMGB1
HMGN1
HMGN2
HMGN3
HMGN4
HNRNPA1
HNRNPC
HNRNPD
HNRNPF
HNRNPH1
HNRNPK
HNRNPL
HNRNPM
HNRNPU
HSDL2
HSPE1
IARS2
IFI16
IK
IKZF1
ILF2
ILF3
IRF2BP2
JMJD1C
JPT1
JPT2
KHDRBS1
KHSRP
KIF2C
KRT1
KRT10
LAP3
LCP1
LDHB
LEMD3
LGALS1
LRPPRC
LSP1
MAGOH
MAGOHB
MAP2K4
MAPRE1
MBD2
MBP
MDC1
MKI67
MNDA
MPHOSPH6
MSN
MTA1
MTA2
MYH13
NCDN
NCL
NEFL
NHLRC2
NOC3L
NOLC1
NONO
NOP2
NPM1
NSUN2
NUCKS1
NUDT21
NUDT5
NUP133
NUP50
PABPC1
PABPN1
PAK2
PARP1
PCBP1
PCBP2
PCMT1
PCNP
PDAP1
PDLIM1
PES1
PFKM
PFKP
PFN1
PGK1
PHC3
PHF6
PKM2
POLDIP3
PPIA
PPIL4
PPM1G
PPP1CB
PPP1CC
PPP1R2B
PRAM1
PRCC
PRDX1
PRKDC
PRPF6
PSMA7
PSMC1
PSME3IP1
PTBP1
PTMA
RACGAP1
RALYL
RAN
RANBP2
RB1
RBM10
RBM14
RBM17
RBM25
RBM39
RBMX
RCC2
RECQL
RFC1
RFC4
RIMS1
RPA1
RPL13
RPL14
RPL22
RPL24
RPL29
RPL5
RPS11
RPS23
RPS27A
RRP1B
RSL1D1
S100A11
S100A4
S100A6
SAFB
SARNP
SATB1
SET
SF3A1
SF3B1
SFPQ
SFPQ 
SH3GL1
SMAP
SMARCA5
SMARCC1
SMARCC2
SMC3
SNRPA1
SOD1
SPR
SPR14
SRP14
SRRM1
SRRM2
SSB
STMN1
SUB1
SUMO2
TCOF1
TERF2
THOC2
THRAP3
THUMPD1
TKT
TMA7
TMPO
TMSB4X
TOP2B
TP53
TPM4
TPR
TRIM28
TRIR
TSSC4
U2AF2
U2SURP
UBE2E1
UBE2M
UPF1
VARS
VIM
WAS
WBP11
WDR33
WIZ
XPO5
XRCC4
YLPM1
ZC3H18
ZC3H4
ZMYM3
ZNF207
ZNF280C
ZNF706
ZNFX1
ZRANB2
ZYX
